# Supplementary material for: Effects of Diets Enriched with Conventional or High-Oleic Canola Oils on Vascular Endothelial Function: A Sub-Study of the Canola Oil Multi-Centre Intervention Trial 2 (COMIT-2), a Randomized Crossover Controlled Feeding Study
Source: MDPI journal article supplement (doi:10.3390/nu14163404), 2022-08-18
Supplement: s1 [file s1]

**Table S1.** Comparison of baseline characteristics in subsample and full sample.

|                               | Mean: subsam-<br>ple | Mean:<br>Total sample | T(df)         | 95% CI          | <i>p</i> |
|-------------------------------|----------------------|-----------------------|---------------|-----------------|----------|
| Age (years)                   | 42.6                 | 45.2                  | 0.97 (46.80)  | −2.83 to 8.07   | 0.34     |
| BMI (kg/m <sup>2</sup> )      | 32.43                | 31.90                 | −0.47 (45.26) | −2.78 to 1.72   | 0.64     |
| Waist (cm)                    | 106.2                | 103.9                 | −0.93 (50.38) | −7.17 to 2.62   | 0.36     |
| TG <sup>#</sup> (mmol/L)      | 1.39                 | 1.42                  | 0.20 (44.05)  | 0.35 to 0.33    | 0.84     |
| HDL-C <sup>#</sup> (mmol/L)   | 1.21                 | 1.34                  | 1.58 (37.69)  | −0.03 to 0.23   | 0.12     |
| SBP (mmHg)                    | 123.9                | 118.6                 | −1.95 (50.07) | −10.75 to 0.16  | 0.06     |
| DBP (mmHg)                    | 85.2                 | 76.7                  | −4.32 (54.26) | −12.32 to −4.50 | <0.001 * |
| Glucose <sup>#</sup> (mmol/L) | 5.31                 | 5.33                  | 0.15 (58.10)  | −0.04 to 0.04   | 0.88     |
| Insulin <sup>#</sup> (pmol/L) | 82.39                | 86.50                 | 0.42 (48.57)  | −0.18 to 0.28   | 0.67     |
| HOMA_IR <sup>#</sup>          | 2.80                 | 2.95                  | 0.43 (51.82)  | −0.19 to 0.29   | 0.67     |

<sup>#</sup> non-normally distributed variables are presented as geometric means; Welch's independent samples t-tests were used to test for significant differences; BMI, body mass index; TG, triglycerides; SBP, systolic blood pressure; DBP, diastolic blood pressure; HDL-C high-density lipoprotein cholesterol; HOMA-IR, homeostatic assessment of insulin resistance; CI, confidence interval.
